# Supplementary material
Source: publisher figshare collection journal article supplement (https://tandf.figshare.com/ndownloader/files/13526786)
Supplement: Supplementary file 1 [file 13526786]

**“ Supporting Information”**

**The influence of hydrogen- and lithium-bonding on the cooperativity of chalcogen bonds: A comparative *ab initio* study**

Mehdi D. Esrafili*, Parisasadat Mousavian and Fariba Mohammadian-Sabet

*Laboratory of Theoretical Chemistry, Department of Chemistry, University of Maragheh, Maragheh, Iran*

* Corresponding Author. **Phone:** (+98) 4212237955. **Fax:** (+98) 4212276060. **P.O. Box:**5513864596***.* E-mail**: [esrafili@maragheh.ac.ir](mailto:esrafili@maragheh.ac.ir).

**Figure S1.** Optimized structure of the NCH···(OCX)n=2–5 and NCLi···(OCX)n=2–5 clusters

(a) NCH···(OCS)n=2–5

**
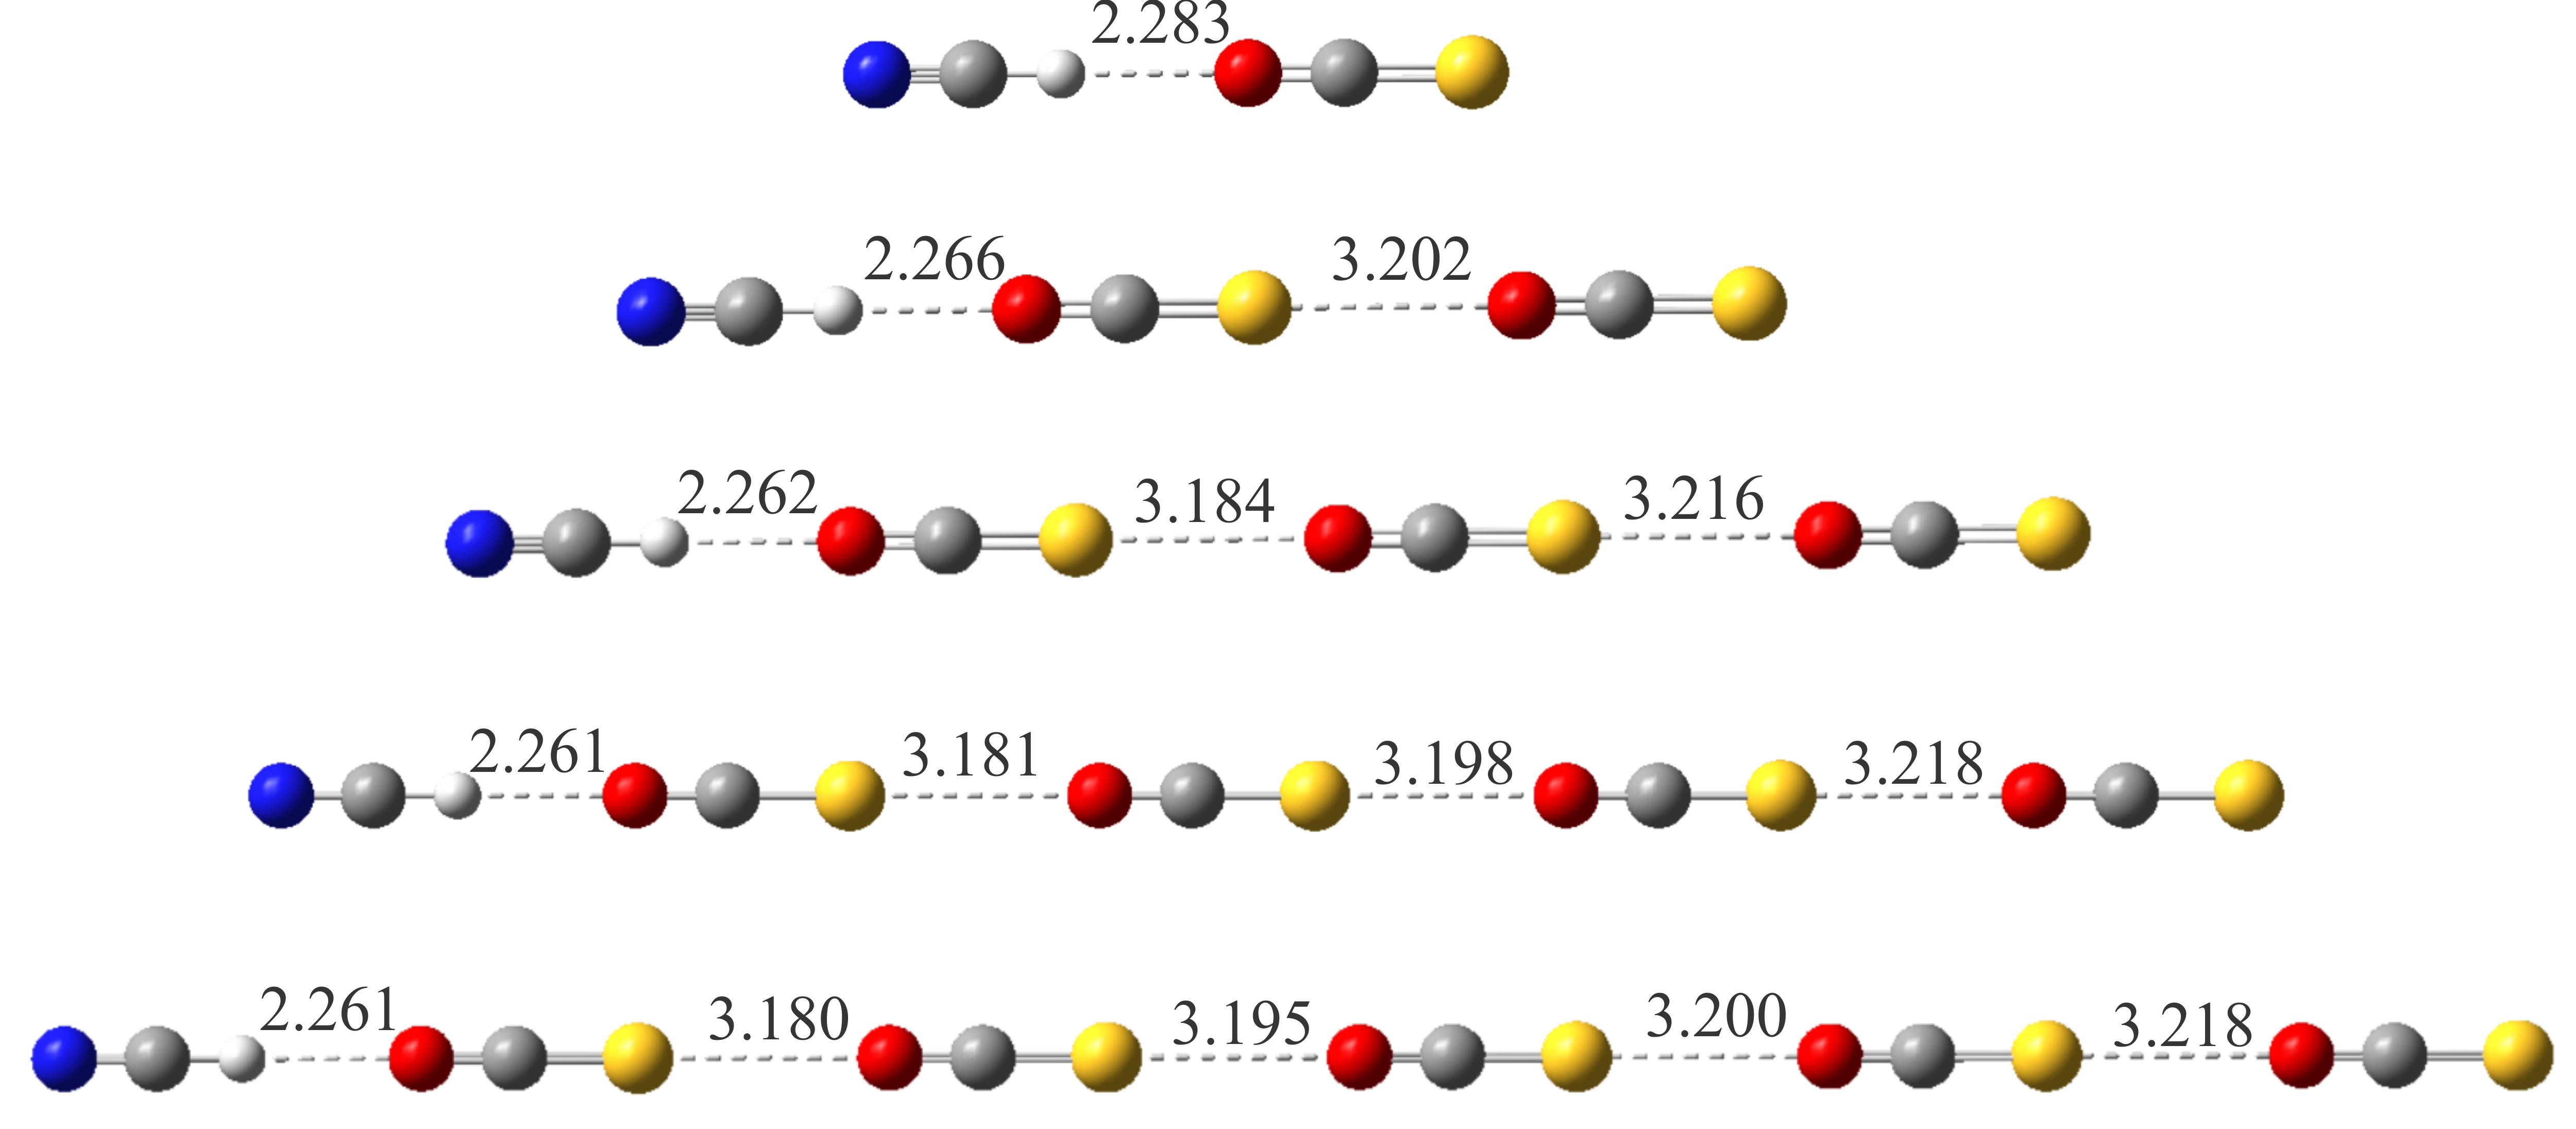
**

(b) NCH···(OCSe)n=2–5

**
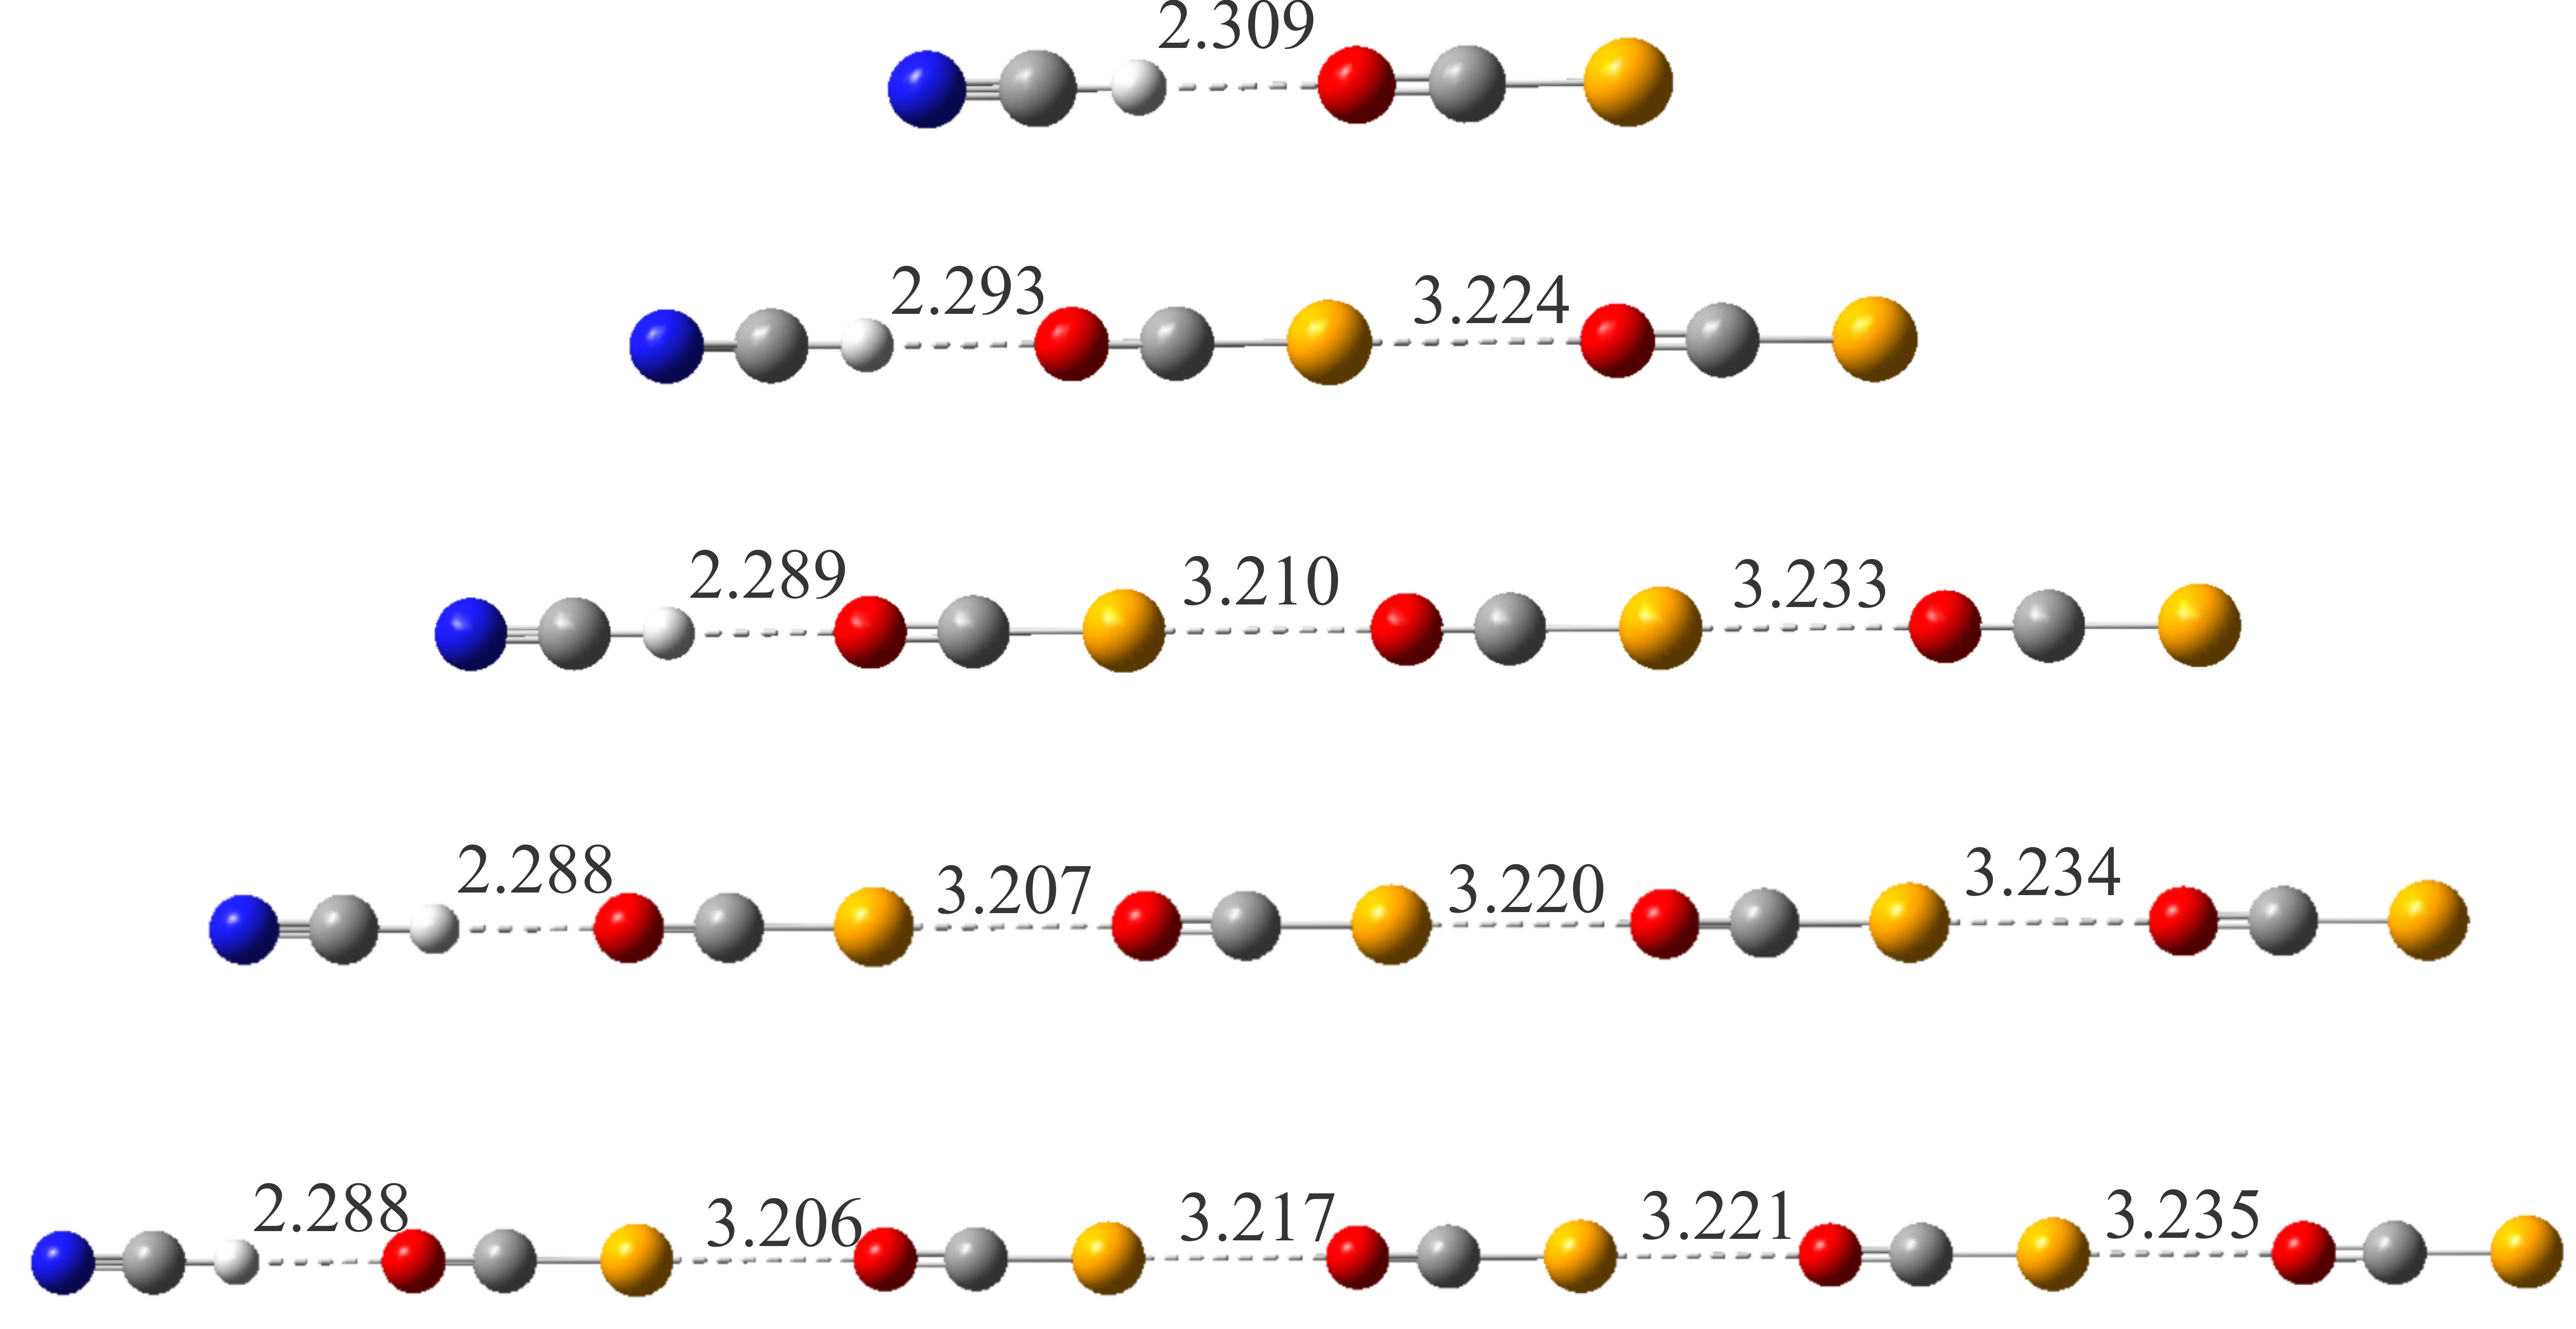
**

(c) NCLi···(OCS)n=2–5

**
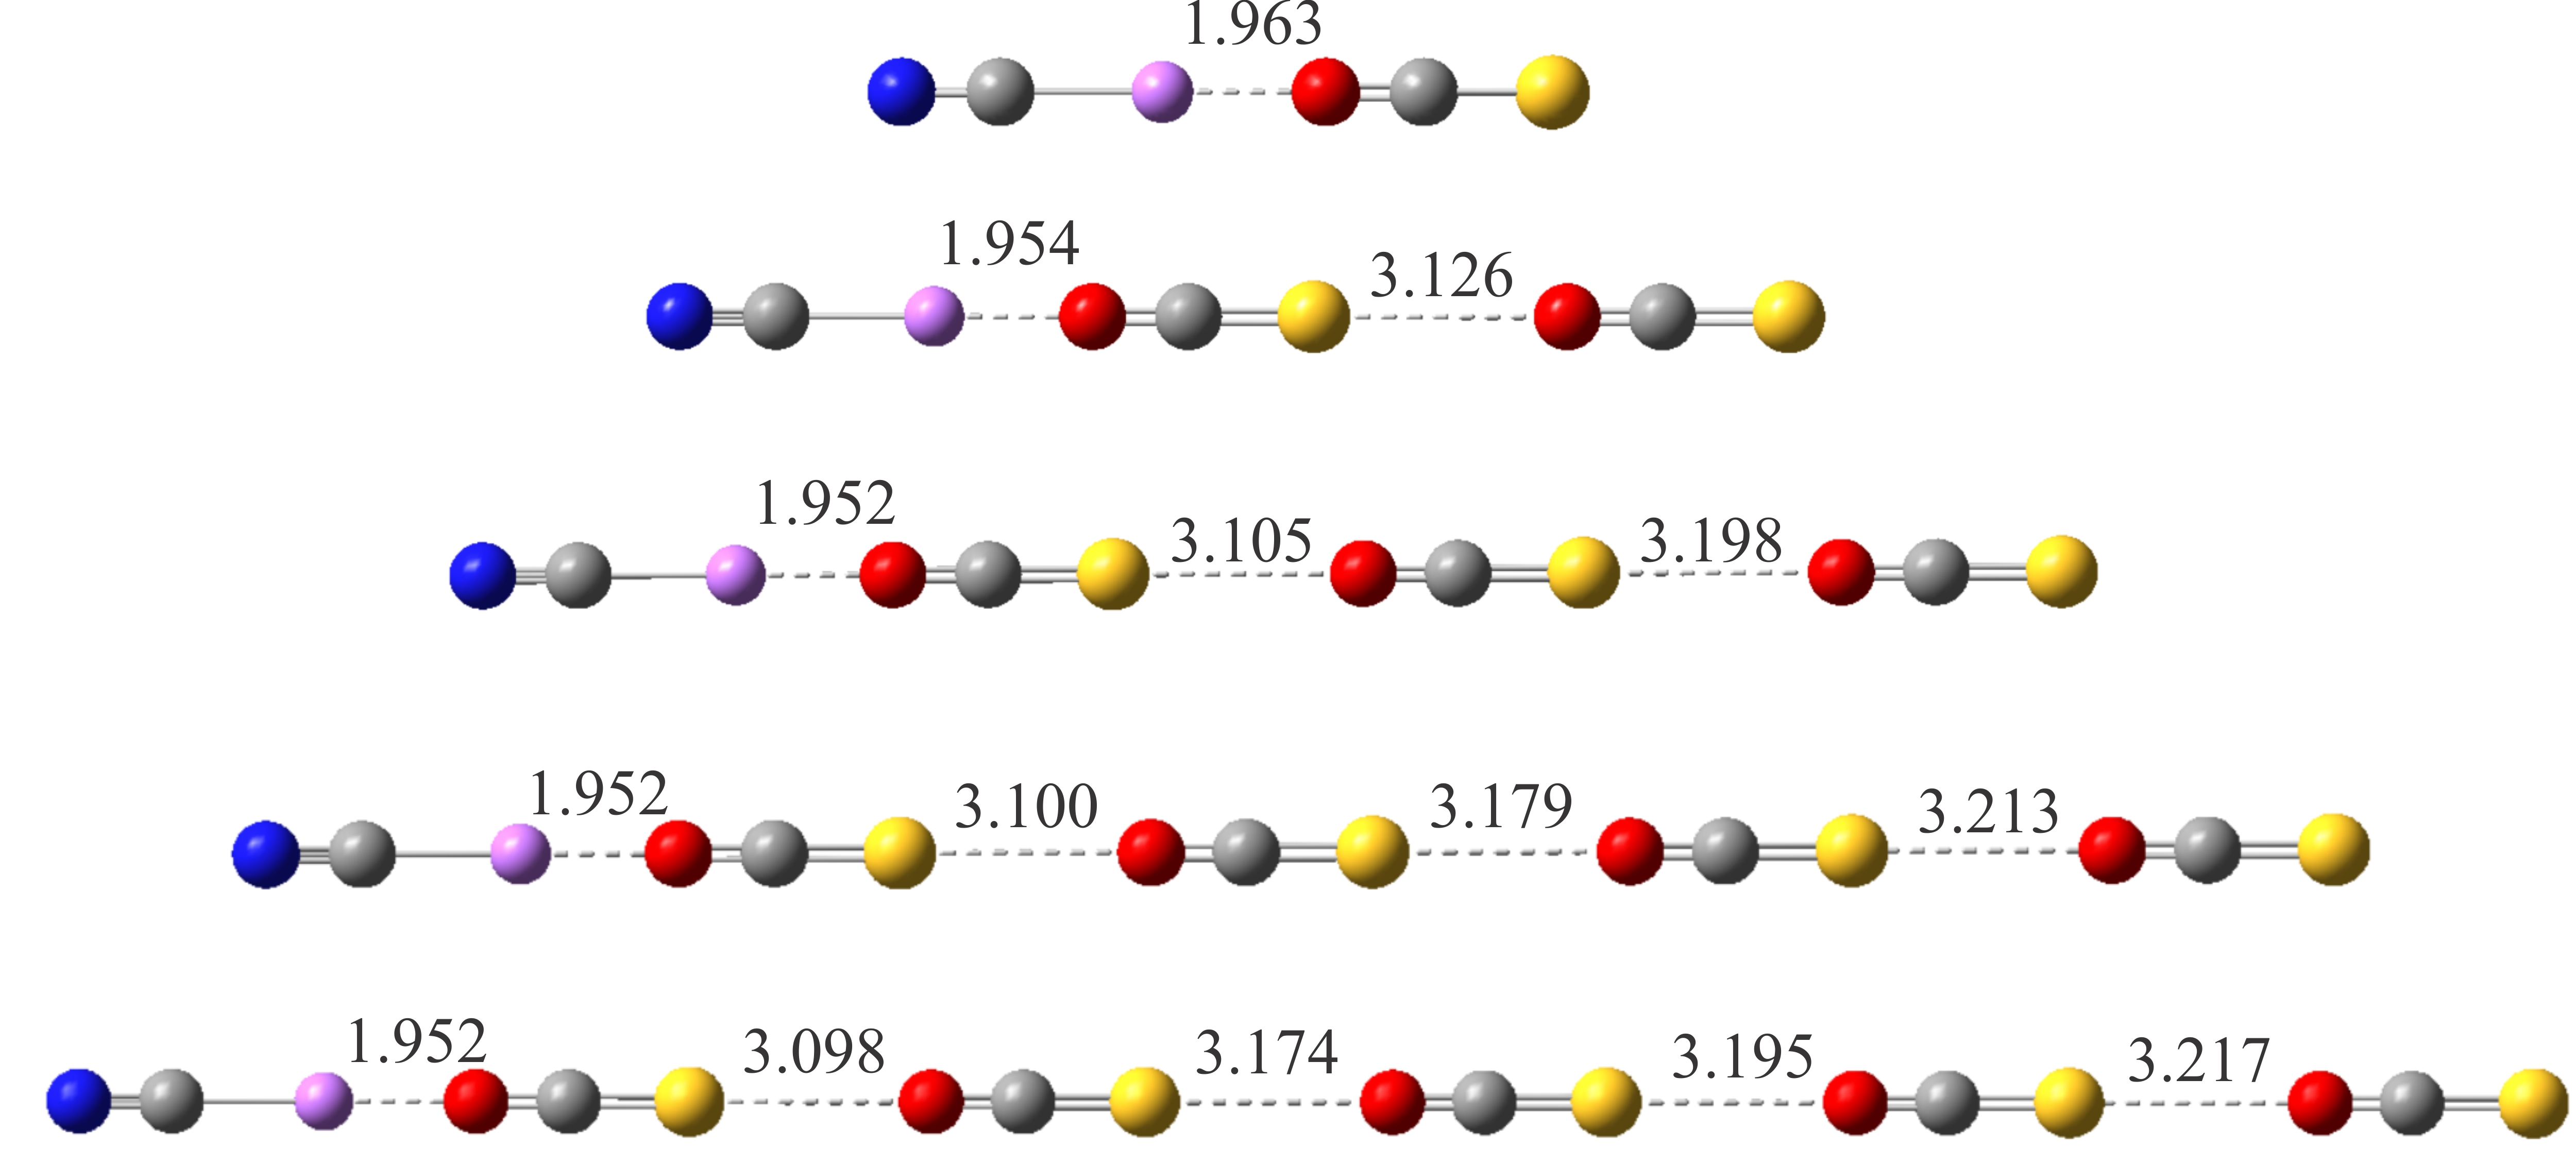
**

(d) NCLi···(OCSe)n=2–5

**
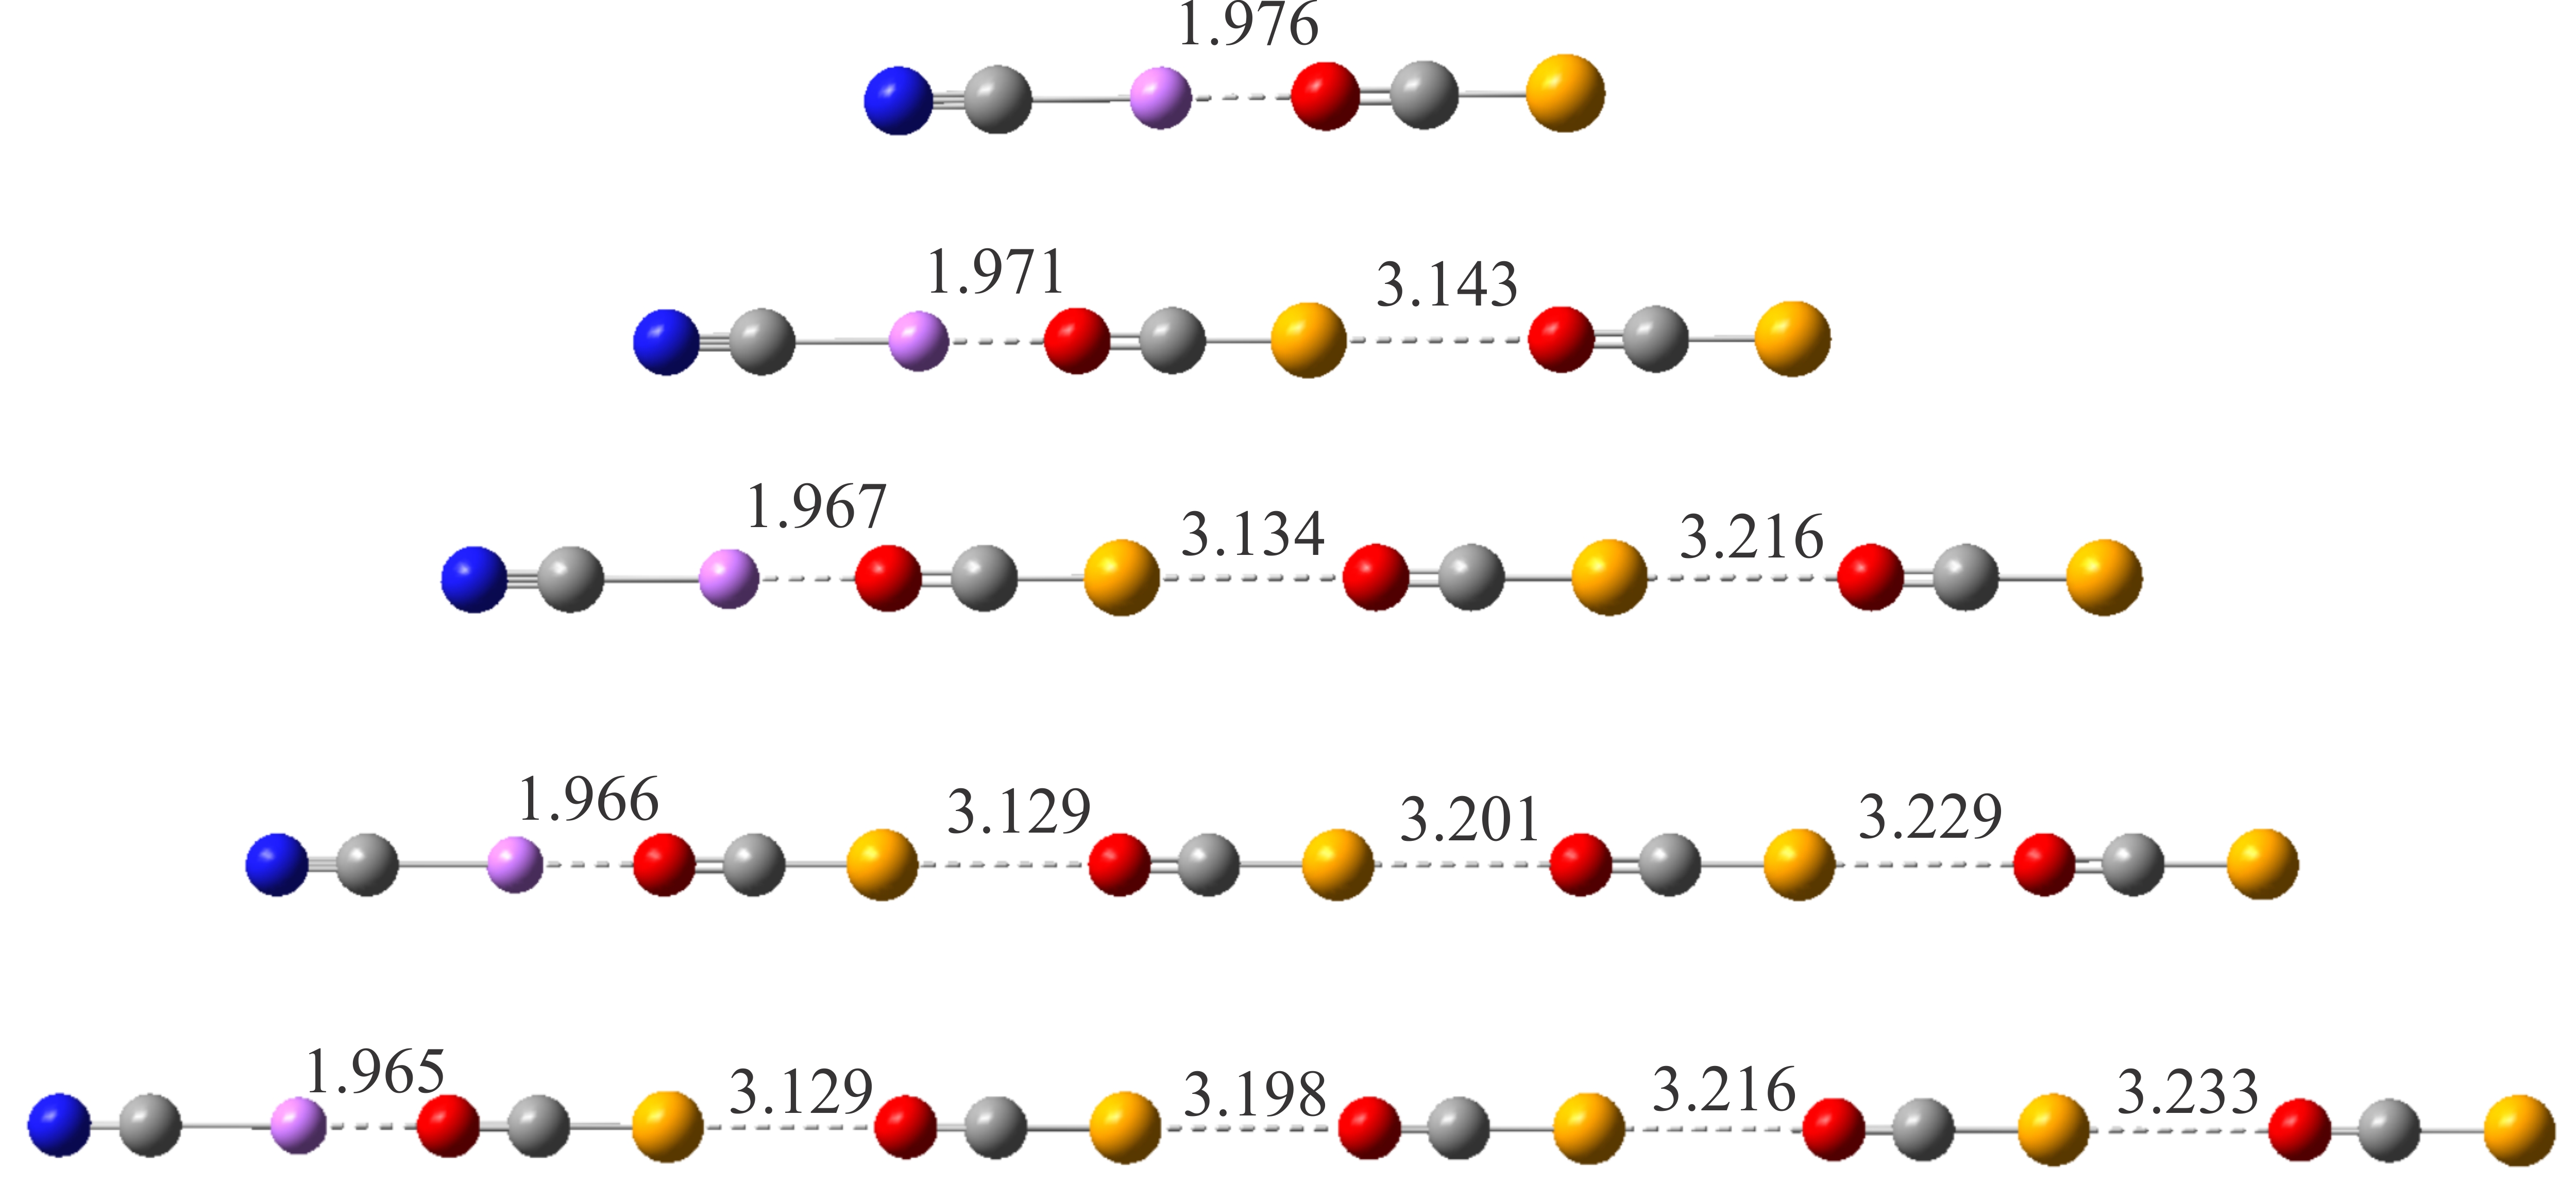
**
